# Supplementary material
Source: publisher figshare collection journal article supplement (https://wiley.figshare.com/ndownloader/files/9696325)
Supplement: Supplementary file 1 [file 9696325]

## Sheet: Serum Sodium
Serum sodium concentration (mmol/L)
Hypoadrenocorticism	Other HypoNa
127	133
106	131
123	127
132	132
106	121
119	125
129	123
128	132
134	131
120
130

## Sheet: Urine Sodium
Urine Sodium Concentration (mmol/L)
Hypoadrenocorticism	Other HypoNa
219	22
218	4
50	11
103	10
41	86
65	2
147	12
56	6
54	4
225
105

## Sheet: Urine Sodium by diagnosis
Urine Sodium Concentration by Diagnosis
	Diagnosis	Urine Sodium (mmol/L)
Effusions	Gastric rupture, septic peritonitis	6
	Septic peritonitis	4
	Pericardial effusion, perforation of left ventricle with pacemaker	11
	Heartworm disease w/ right heart failure	4
Pyelonephritis	Pyelonephritis	86
	Sepsis, IMHA	10
Other	Distemper, vomiting and diarrhea	2
	Uncharacterized intracranial disease, UTI	22
	Urethral obstruction, hookworms	12
Hypoadrenocorticism	Hypoadrenocorticism	219
	Hypoadrenocorticism	218
	Hypoadrenocorticism	50
	Hypoadrenocorticism	103
	Hypoadrenocorticism	41
	Hypoadrenocorticism	65
	Hypoadrenocorticism	147
	Hypoadrenocorticism	56
	Hypoadrenocorticism	54
	Hypoadrenocorticism	225
	Hypoadrenocorticism	105
